# Supplementary material for: Vitamin D3 Bioaccessibility from Supplements and Foods—Gastric pH Effect Using a Static In Vitro Gastrointestinal Model
Source: MDPI journal article supplement (doi:10.3390/molecules29051153), 2024-03-05
Supplement: s1 [file s1]

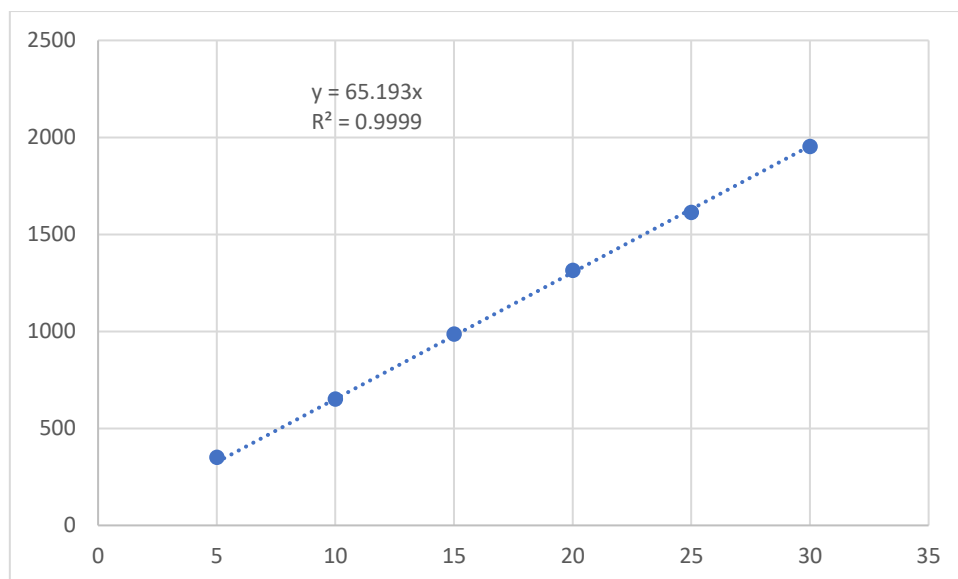

**Figure S1.** Vitamin D<sub>3</sub> standard curve

**Table S1.** Average peak areas (n=3) of low concentrations of vitamin D<sub>3</sub> standard

| Concentration (ppm) | Response |
|---------------------|----------|
| 0.05                | 2.75     |
| 0.1                 | 6.4      |
| 0.15                | 6.91     |
| 0.2                 | 10.98    |
| 0.25                | 14.28    |
| 0.3                 | 15.83    |

**Table S2.** LINEST function parameters

| Parameter                      | Value |
|--------------------------------|-------|
| Slope of standard curve        | 53.21 |
| Standard deviation of response | 0.88  |

The limit of detection (LOD) and limit of quantification (LOQ) are calculated based on the following equations:

$$LOD = 3.3 * S_y / S$$

$$LOQ = 10 * S_y / S$$

Where  $S_y$  is the standard deviation of the response and  $S$  is the slope of the standard curve.

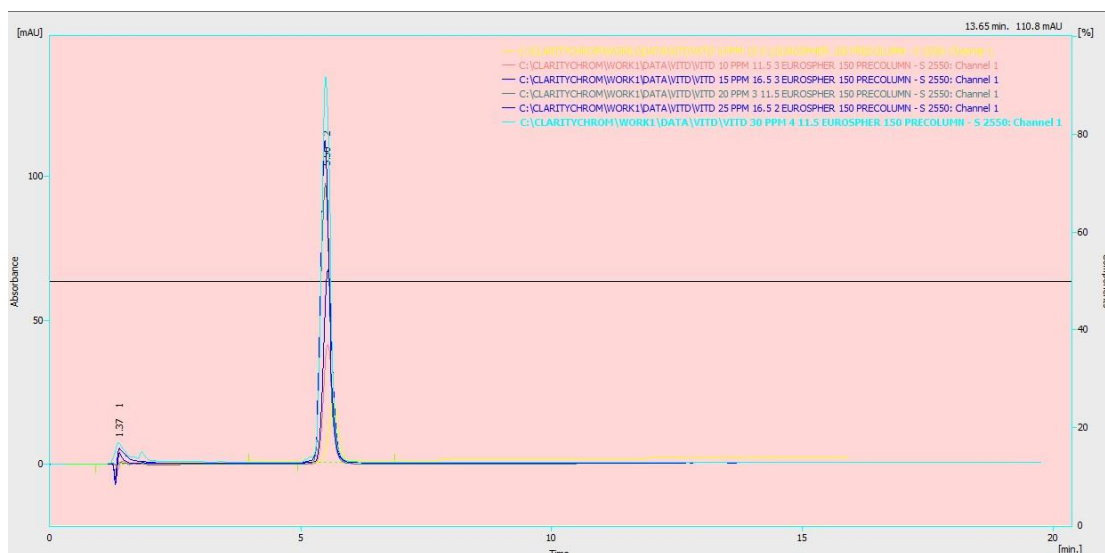

**Figure S2.** Vitamin D<sub>3</sub> standards for standard curve

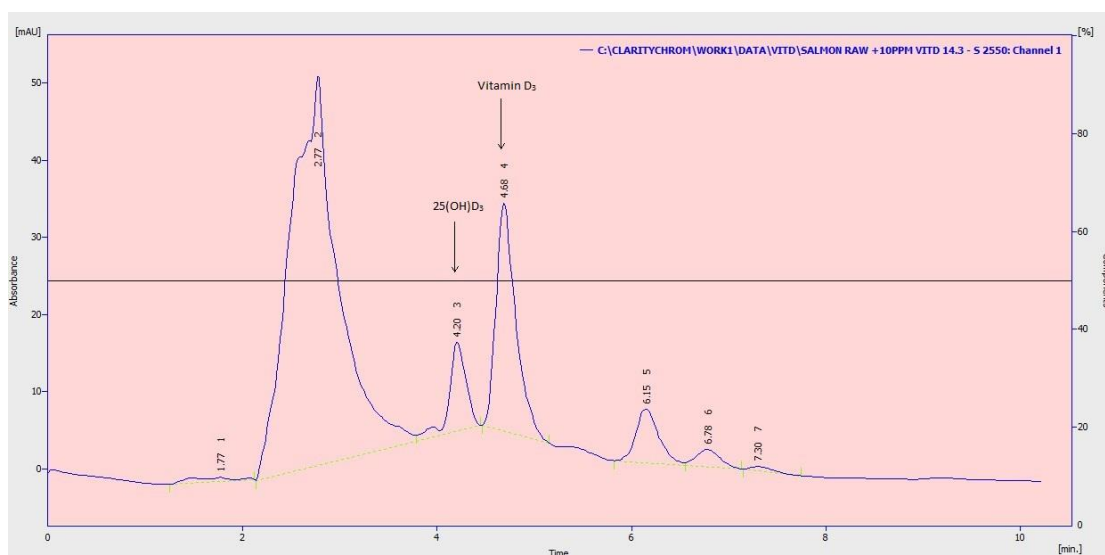

**Figure S3.** Raw salmon sample spiked with vitamin D<sub>3</sub>.

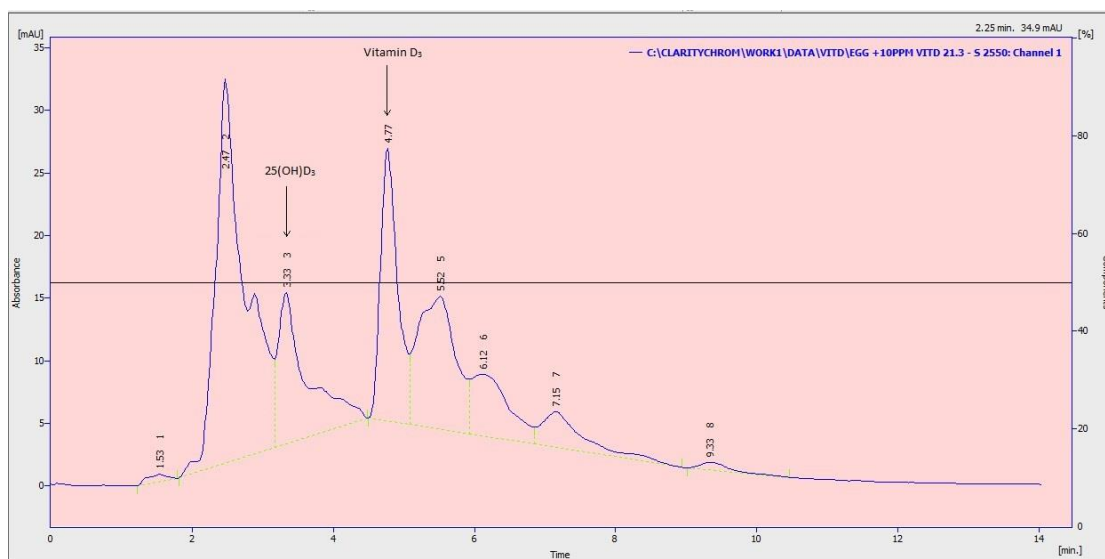

**Figure S4.** Raw egg sample spiked with vitamin D<sub>3</sub>.

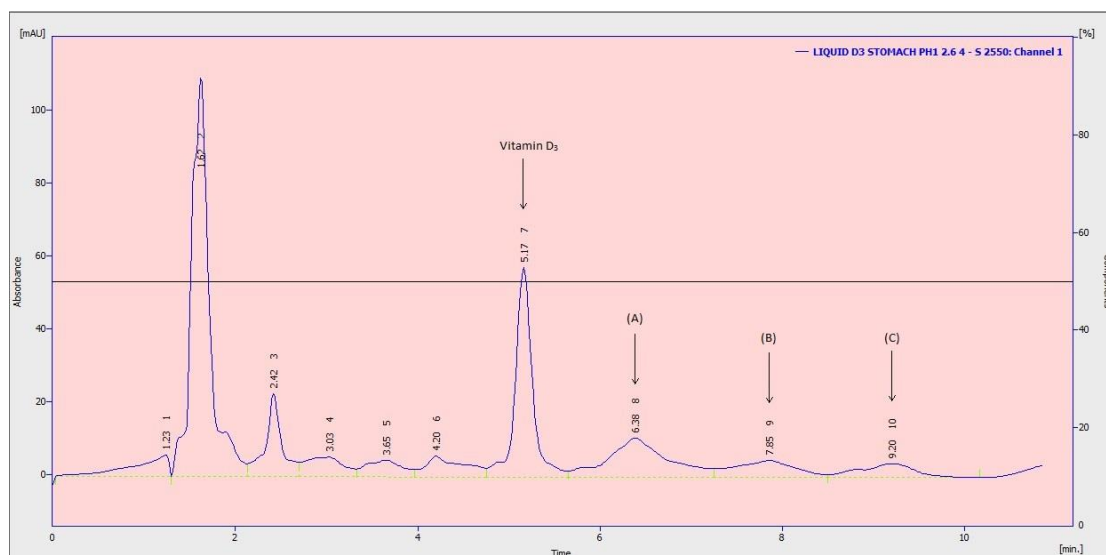

**Figure S5.** Chromatograph of liquid supplement after gastric digestion at pH 1. (A), (B) and (C) may be isomers of vitamin D<sub>3</sub>, produced during digestion due to acidic degradation.
